# Supplementary material
Source: PubMed Central journal article supplement (PMC3063588)
Supplement: 1001224107_pnas.201001224SI.pdf [file 1001224107_pnas.201001224SI.pdf]

# Supporting Information

Rea et al. 10.1073/pnas.1001224107

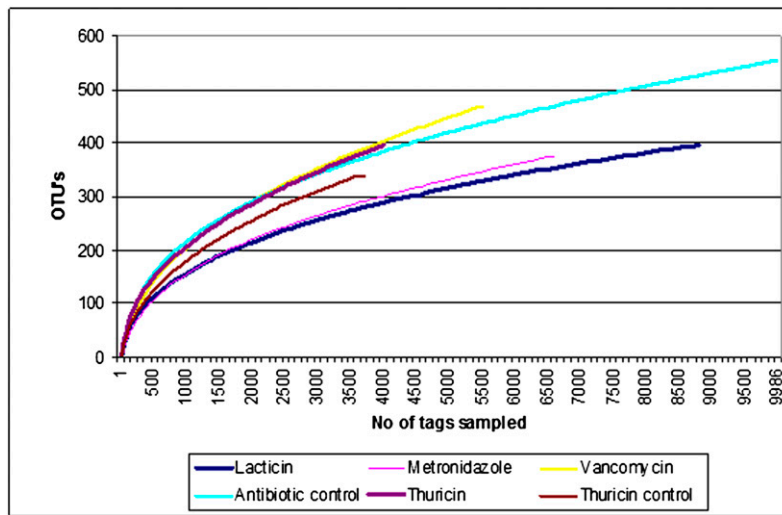

Fig. S1. Rarefaction curves at 98% similarity levels for all six datasets. Number of operational taxonomic units identified as a function of the number of sequence tags sampled.

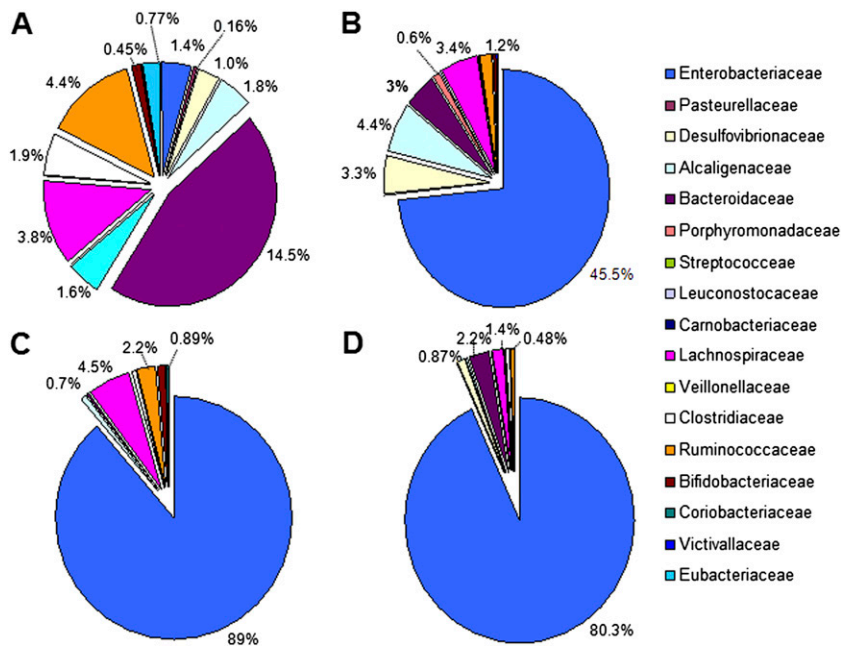

Fig. S2. Family-level diversity of gut communities in a human fecal fermentation, expressed as percentage of total population of assignable tags. (A) Control vessel treated with no antibiotic; (B) vessel treated with vancomycin (90  $\mu$ M); (C) vessel treated with metronidazole (90  $\mu$ M); (D) vessel treated with purified lacticin 3147 (270  $\mu$ M).

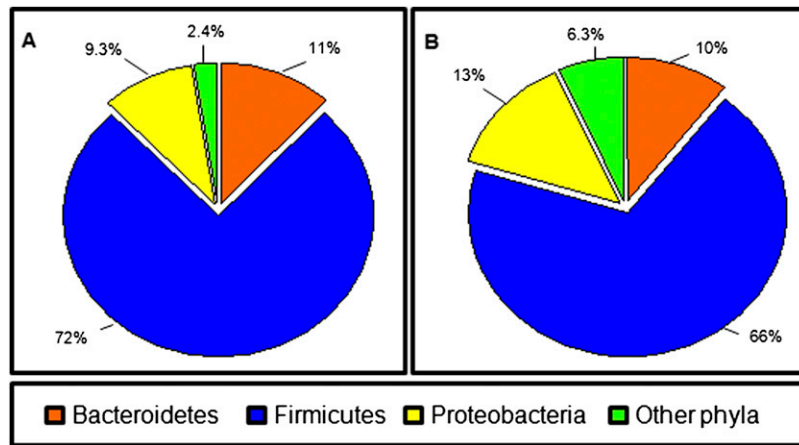

**Fig. S3.** Phylum-level taxonomic distribution of the microbial communities present in a human fecal fermentation, expressed as percentage of total assignable population. (A) Control vessel treated with no antibiotic; (B) vessel treated with thuricin CD (90  $\mu\text{M}$ ). Other phyla: Actinobacteria, Spirochaetes, Lentisphaerae, and Terricutes.

**Table S1.** Pearson correlation coefficients calculated for antimicrobial treatments vs. control

| Treatment                 | Pearson correlation coefficient |
|---------------------------|---------------------------------|
| Lacticin vs. control      | -0.02839963                     |
| Vancomycin vs. control    | 0.3311532                       |
| Metronidazole vs. control | 0.109755048                     |
| Thuricin vs. control      | 0.995625797                     |

A value of  $<0.5$  denotes significance.
